# Supplementary material for: An observational study of anaerobic bacteria in cystic fibrosis lung using culture dependant and independent approaches
Source: PubMed Central journal article supplement (PMC7994387; doi:10.1038/s41598-021-85592-w), 2021-03-25
Supplement: 41598_2021_85592_MOESM1_ESM.pdf [file 41598_2021_85592_MOESM1_ESM.pdf]

## **An observational study of anaerobic bacteria in cystic fibrosis lung using culture dependant and independent approaches**

Claudie Lamoureux<sup>1,2</sup>, Charles-Antoine Guilloux<sup>1</sup>, Clémence Beauruelle<sup>1,2</sup>, Stéphanie Gouriou<sup>1</sup>, Sophie Ramel<sup>3</sup>, Anne Dirou<sup>3</sup>, Jean Le Bihan<sup>3</sup>, Krista Revert<sup>3</sup>, Thomas Ropars<sup>3</sup>, Rosyne Lagrafeuille<sup>1</sup>, Sophie Vallet<sup>1,2</sup>, Rozenn Le Berre<sup>1,4</sup>, Emmanuel Nowak<sup>5</sup>, Geneviève Héry-Arnaud<sup>1,2\*</sup>

<sup>1)</sup> Univ Brest, INSERM, EFS, UMR 1078, GGB, F-29200 Brest, France

<sup>2)</sup> Department of Bacteriology, Virology, Hospital Hygiene, and Parasitology-Myology, Brest University Hospital, Brest, France

<sup>3)</sup> Cystic Fibrosis Center of Roscoff, Fondation Ildys, Roscoff, France

<sup>4)</sup> Department of Pulmonary and Internal Medicine, Brest University Hospital, Brest, France

<sup>5)</sup> INSERM CIC 1412, Brest University Hospital, Brest, France

### **Corresponding author:**

Prof. Geneviève Héry-Arnaud, Department of Bacteriology-Virology, Hospital Hygiene, Parasitology-Myology, Brest University Hospital, Boulevard Tanguy Prigent, 29200 Brest, France

Mail: hery@univ-brest.fr

Tel: +33 2 98 14 51 02/ Fax: +33 (0)2 98 14 51 49

## Supplementary Information

### Sample kit

The kit consists of a sterile polypropylene tube with a filter cap for gas exchange and an anaerobic atmosphere generator to reduce the oxygen content (<1% in 30 minutes), placed in a sealed plastic transport pouch closed with a removable bar (Fig. S1).

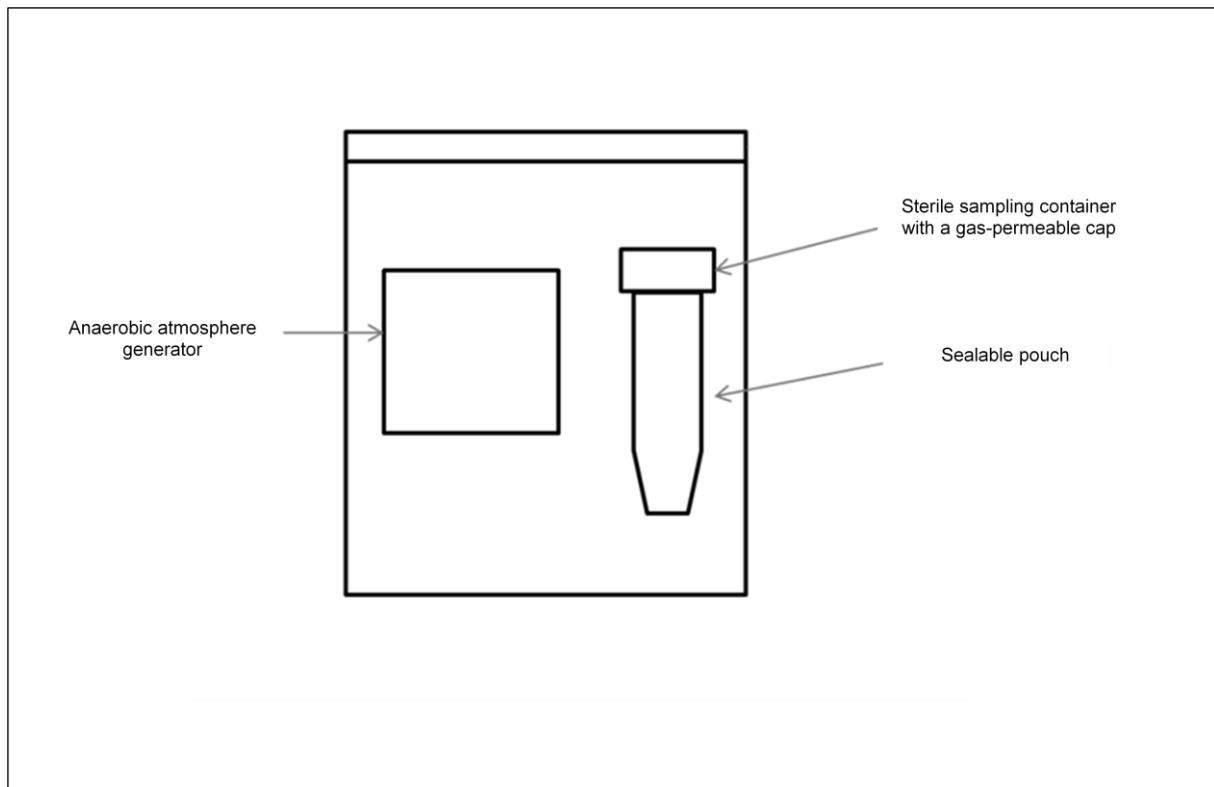

**Figure S1.** Sampling kit used in the study as described in the patent EP 20305133.9

### Validation of qPCR assays targeting *Prevotella*, *Veillonella* and *Fusobacterium*

Molecular tests were performed to determine sensitivity, specificity and efficiency of our molecular approach (in addition to the initial assessment of primers<sup>43–45</sup>).

**Sensitivity:** several species have been selected to test the qPCR sensitivity (***Prevotella***: *P. buccae*, *P. buccalis*, *P. bivia*, *P. denticola*, *P. histicola*, *P. intermedia*, *P. maculosa*, *P. melaninogenica*, *P. nanceinsis*, *P. nigrescens*, *P. pallens*, *P. salivae*, *P. timonensis*, *P. veroralis*; ***Veillonella***: *V. atypica*, *V. dispar*, *V. parvula*; ***Fusobacterium***: *F. gonidiaformans*, *F. nucleatum*, *F. ulcerans*).

Specificity: a panel of bacteria and fungi was used to determine specificity of each primer. Our choice was guided to include a wide variety of bacteria and fungi which are frequently detected in CF sputum (**Gram positive bacteria:** *Actinomyces odontolyticus*, *Gemella morbillorum*, *Granulicatella adiacens*, *Lactobacillus plantarum*, *Peptostreptococcus anaerobius*, *Rothia dentocariosa*, *Staphylococcus aureus*, *Streptococcus salivarius*; **Gram negative bacteria:** *Achromobacter xylosoxidans*, *Bacteroides fragilis*, *Burkholderia cepacia*, *Burkholderia multivorans*, *Campylobacter jejuni*, *Capnocytophaga* sp, *Fusobacterium nucleatum*, *Haemophilus parainfluenzae*, *Klebsiella pneumoniae*, *Neisseria flavescens*, *Porphyromonas gingivalis*, *Prevotella bivia*, *Pseudomonas aeruginosa*, *Pseudomonas putida*, *Stenotrophomonas maltophilia*, *Veillonella parvula*; **Mycobacteria:** *Mycobacterium abscessus*; **Fungi:** *Aspergillus* sp, *Candida albicans*, *Penicillium* sp).

Among the 28 microorganisms tested, five were detected by primers targeting *Prevotella*, three by primers targeting *Veillonella* and four by primers targeting *Fusobacterium*. All these species were detected positive with a Ct greater than 34. In order to compensate for this lack of specificity, a cut-off for Ct of 34 was determined for each qPCR; beyond this cut-off, the sample was considered negative.

Efficiency: the efficiency of each primer pair was determined, using a concentration range of pure and diluted DNA at 1/10th, 1/100th, 1/1000th and 1/10,000th. Each dilution was distributed in duplicate. Efficiencies of qPCR have been determined at 85.5% ( $R^2=1$ ) for *Prevotella*, 92.6% ( $R^2=0.998$ ) for *Veillonella*, and 88.2% ( $R^2 = 0.999$ ) for *Fusobacterium*.

#### Interpretation of qPCR data

A concentration range from  $10^2$  to  $10^8$  CFU/mL, using a standard agar plate colony counting method, was achieved. Three species mainly represented for each genus were chosen (*Prevotella melaninogenica*, *Veillonella parvula*, and *Fusobacterium nucleatum*). Each concentration point of the range was extracted and a qPCR was performed to obtain a standard curve for each species.

#### Isolates identification by mass spectrometry (MALDI-TOF MS)

Culture isolates identification was performed using MALDI-TOF MS Biotyper MBT with the Bruker's library version 7 (Bruker, Billerica, USA) including 7311 reference spectra. This database references 2509 bacterial species, including nearly 300 strict anaerobic species. The identification criteria of

MALDI-TOF MS were as follows: a score of  $\geq 2.0$  was considered as accurate species-level identification;  $\geq 1.7$  but  $< 2.0$  as a probable genus-level identification; an isolate with a score  $< 1.7$  was considered as “unidentified”<sup>47</sup>. In order to improve isolates identification, 1  $\mu\text{L}$  of 70% formic acid LC/MS (VWR, Radnor, USA) was added before the addition of 1  $\mu\text{L}$  of portioned IVD-HHCA matrix (Bruker, Billerica, USA).

**Table S1.** Description of the Murray-Washington cytological score used for the sputum quality and salivary contamination appreciation (adapted to Bartlett's criteria for interpretation <sup>23</sup>)

| Score | Leucocytes number | Epithelial cells number | Salivary contamination |
|-------|-------------------|-------------------------|------------------------|
| 5     | >25               | <10                     | Low                    |
| 4     | >25               | 10-25                   | Intermediate           |
| 3     | >25               | >25                     |                        |
| 2     | 10-25             | >25                     | High                   |
| 1     | <10               | >25                     |                        |
| 0     | <10               | <10                     |                        |

**Table S2.** Study cohort analysed only by extended-culture approach (80 people with cystic fibrosis): demographic and clinical data

| Patient characteristics                                              |                             | n (%)     |
|----------------------------------------------------------------------|-----------------------------|-----------|
| <b>Age group</b><br>(years)                                          | <13                         | 7 (8.8)   |
|                                                                      | 13 - <18                    | 2 (2.5)   |
|                                                                      | 18 - <25                    | 23 (28.7) |
|                                                                      | 25 - <30                    | 11 (13.8) |
|                                                                      | ≥ 30                        | 37 (46.2) |
| <b>Gender</b>                                                        | Female                      | 39 (48.8) |
|                                                                      | Male                        | 41 (51.2) |
| <b>cftr mutation</b>                                                 | p.F508del homozygote        | 43 (53.7) |
|                                                                      | p.F508del heterozygote      | 27 (33.8) |
|                                                                      | Other mutation              | 10 (12.5) |
| <b>Pancreas status</b>                                               | Pancreatic sufficiency      | 7 (8.8)   |
|                                                                      | Pancreatic insufficiency    | 73 (91.2) |
| <b>Body-mass index<sup>▲</sup></b><br>(kg/m <sup>2</sup> )           | Underweight (<18.5)         | 19 (23.8) |
|                                                                      | Reference value (18.5-24.9) | 53 (66.2) |
|                                                                      | Overweight/Obesity (>24.9)  | 8 (10.0)  |
| <b>Lung function</b><br>(Forced Expiratory Volume in one second, %)  | <40                         | 21 (26.3) |
|                                                                      | 40-70                       | 44 (55.0) |
|                                                                      | >70                         | 15 (18.7) |
| <b>Chronic antibiotic therapy</b><br>(inhaled and/or oral)           | Azithromycin                | 44 (55.0) |
|                                                                      | Tobramycin                  | 17 (21.3) |
|                                                                      | Colistin                    | 40 (50.0) |
|                                                                      | Aztreonam                   | 8 (10.0)  |
| <b>Oral antibiotic therapy</b><br>(one month before)                 | Yes                         | 34 (42.5) |
|                                                                      | No                          | 46 (57.5) |
| <b>Corticosteroids</b><br>(inhaled and/or oral)                      | Yes                         | 60 (75.0) |
|                                                                      | No                          | 20 (25.0) |
| <b>Diabetes</b>                                                      | Yes                         | 32 (40.0) |
|                                                                      | No                          | 58 (60.0) |
| <b>CFTR modulators</b><br>(ivacaftor, lumacaftor)                    | Yes                         | 21 (26.3) |
|                                                                      | No                          | 54 (67.5) |
|                                                                      | Change during study         | 5 (6.2)   |
| <b>Leeds status</b><br>( <i>Pseudomonas aeruginosa</i> colonisation) | Never                       | 5 (6.2)   |
|                                                                      | Free                        | 18 (22.5) |
|                                                                      | Intermittent                | 9 (11.3)  |
|                                                                      | Chronic                     | 48 (60.0) |

**Table S3.** Number of duplicate and non-duplicate species per patient (by extended-culture approach)

| Patient identification<br>(number of samples) | Total number<br>of duplicate<br>species | Total number of<br>non-duplicate<br>species | Percentage of<br>duplicate species<br>per patient |
|-----------------------------------------------|-----------------------------------------|---------------------------------------------|---------------------------------------------------|
| P2 (2)                                        | 4                                       | 17                                          | 19.0                                              |
| P4 (2)                                        | 0                                       | 9                                           | 0                                                 |
| P5 (2)                                        | 4                                       | 8                                           | 33.3                                              |
| P12 (2)                                       | 4                                       | 16                                          | 20.0                                              |
| P14 (2)                                       | 2                                       | 10                                          | 16.7                                              |
| P17 (3)                                       | 7                                       | 19                                          | 26.9                                              |
| P18 (3)                                       | 8                                       | 16                                          | 33.3                                              |
| P24 (2)                                       | 0                                       | 2                                           | 0                                                 |
| P37 (2)                                       | 2                                       | 12                                          | 14.3                                              |
| P40 (2)                                       | 4                                       | 19                                          | 17.4                                              |
| P44 (2)                                       | 3                                       | 7                                           | 30.0                                              |
| P45 (2)                                       | 3                                       | 16                                          | 15.8                                              |
| P46 (2)                                       | 1                                       | 10                                          | 9.1                                               |
| P57 (2)                                       | 2                                       | 7                                           | 22.2                                              |
| P58 (2)                                       | 4                                       | 12                                          | 25.0                                              |
| P59 (2)                                       | 3                                       | 16                                          | 15.8                                              |
| P60 (3)                                       | 7                                       | 18                                          | 28.0                                              |
| P61 (2)                                       | 1                                       | 7                                           | 12.5                                              |
| P62 (2)                                       | 6                                       | 16                                          | 27.3                                              |
| P63 (2)                                       | 0                                       | 11                                          | 0                                                 |
| P66 (2)                                       | 4                                       | 15                                          | 21.1                                              |
| P67 (2)                                       | 3                                       | 12                                          | 20.0                                              |
| P73 (2)                                       | 3                                       | 10                                          | 23.1                                              |
| P76 (2)                                       | 7                                       | 21                                          | 25.0                                              |
| P77 (2)                                       | 1                                       | 14                                          | 6.7                                               |
| P84 (2)                                       | 2                                       | 12                                          | 14.3                                              |
| P86 (2)                                       | 5                                       | 10                                          | 33.3                                              |
| P87 (2)                                       | 0                                       | 2                                           | 0                                                 |
| P90 (2)                                       | 2                                       | 13                                          | 13.3                                              |

**Table S4.** List of the 69 species detected by extended culture in 112 CF sputum samples

| Species                                           | Percentage (n) |
|---------------------------------------------------|----------------|
| <i>Alloprevotella rava</i> <sup>▲</sup>           | 0.1 (1)        |
| <i>Alloprevotella tannerae</i> <sup>▲</sup>       | 0.1 (1)        |
| <i>Anaerococcus murdochii</i> <sup>○</sup>        | 0.1 (1)        |
| <i>Atopobium parvulum</i> <sup>○</sup>            | 4.5 (31)       |
| <i>Atopobium rimae</i> <sup>○</sup>               | 1.6 (11)       |
| <i>Bulleidia extracta</i> <sup>○</sup>            | 0.1 (1)        |
| <i>Catonella morbi</i> <sup>▲</sup>               | 0.7 (5)        |
| <i>Cryptobacterium curtum</i> <sup>▲</sup>        | 0.1 (1)        |
| <i>Eubacterium brachy</i> <sup>○</sup>            | 0.7 (5)        |
| <i>Eubacterium infirmum</i> <sup>▲</sup>          | 0.3 (2)        |
| <i>Eubacterium sulci</i> <sup>▲</sup>             | 1.6 (11)       |
| <i>Fingoldia magna</i> <sup>○</sup>               | 0.3 (2)        |
| <i>Fusobacterium canifelinum</i> <sup>○</sup>     | 0.1 (1)        |
| <i>Fusobacterium naviforme</i> <sup>○</sup>       | 0.3 (2)        |
| <i>Fusobacterium nucleatum</i> <sup>○▲</sup>      | 3.7 (25)       |
| <i>Fusobacterium periodonticum</i> <sup>○▲</sup>  | 0.6 (5)        |
| <i>Fusobacterium sp.</i> <sup>○▲</sup>            | 0.4 (3)        |
| <i>Lachnoanaerobaculum orale</i> <sup>○</sup>     | 0.9 (6)        |
| <i>Lachnoanaerobaculum umeaense</i> <sup>○</sup>  | 0.3 (2)        |
| <i>Lachnoanaerobaculum sp.</i> <sup>○▲</sup>      | 0.3 (2)        |
| <i>Leptotrichia wadei</i> <sup>○▲</sup>           | 1.0 (7)        |
| <i>Leptotrichia sp.</i> <sup>○▲</sup>             | 0.9 (6)        |
| <i>Megasphaera micronuciformis</i> <sup>○</sup>   | 2.0 (14)       |
| <i>Mogibacterium diversum</i> <sup>▲</sup>        | 1.6 (11)       |
| <i>Olsenella uli</i> <sup>○</sup>                 | 0.3 (2)        |
| <i>Oribacterium sp.</i> <sup>▲</sup>              | 1.0 (7)        |
| <i>Parascardovia denticolens</i> <sup>○</sup>     | 0.1 (1)        |
| <i>Parvimonas micra</i> <sup>○</sup>              | 2.9 (20)       |
| <i>Peptoniphilus harei</i> <sup>○</sup>           | 0.4 (3)        |
| <i>Peptoniphilus lacrimalis</i> <sup>○</sup>      | 0.1 (1)        |
| <i>Peptostreptococcus anaerobius</i> <sup>○</sup> | 0.3 (2)        |
| <i>Peptostreptococcus stomatis</i> <sup>▲</sup>   | 2.5 (17)       |
| <i>Porphyromonas catoniae</i> <sup>○▲</sup>       | 0.3 (2)        |
| <i>Porphyromonas gingivalis</i> <sup>○</sup>      | 0.1 (1)        |
| <i>Porphyromonas pasteri</i> <sup>▲</sup>         | 1.0 (7)        |
| <i>Porphyromonas uenonis</i> <sup>○▲</sup>        | 0.3 (2)        |
| <i>Prevotella baroniae</i> <sup>○</sup>           | 0.1 (1)        |
| <i>Prevotella buccae</i> <sup>○</sup>             | 1.4 (10)       |
| <i>Prevotella denticola</i> <sup>○</sup>          | 3.5 (24)       |
| <i>Prevotella histicola</i> <sup>○</sup>          | 5.9 (41)       |
| <i>Prevotella intermedia</i> <sup>○</sup>         | 0.6 (4)        |
| <i>Prevotella loescheii</i> <sup>○</sup>          | 0.3 (2)        |
| <i>Prevotella maculosa</i> <sup>○</sup>           | 0.4 (3)        |
| <i>Prevotella marshii</i> <sup>○</sup>            | 0.3 (2)        |



|                                           |          |
|-------------------------------------------|----------|
| <i>Prevotella melaninogenica</i> °        | 9.5 (66) |
| <i>Prevotella nanceiensis</i> °           | 2.5 (17) |
| <i>Prevotella nigrescens</i> °            | 5.3 (37) |
| <i>Prevotella oralis</i> °                | 1.3 (9)  |
| <i>Prevotella oulorum</i> °               | 1.0 (7)  |
| <i>Prevotella pallens</i> °               | 3.6 (25) |
| <i>Prevotella salivae</i> °               | 5.8 (40) |
| <i>Prevotella timonensis</i> °            | 0.6 (4)  |
| <i>Prevotella veroralis</i> °             | 0.9 (6)  |
| <i>Propionibacterium acidifaciens</i> ° ▲ | 1.9 (13) |
| <i>Pyramidobacter piscicolens</i> ▲       | 0.1 (1)  |
| <i>Scardovia wiggisiae</i> ▲              | 1.9 (13) |
| <i>Selenomonas infelix</i> °              | 0.3 (2)  |
| <i>Selenomonas noxia</i> ▲                | 0.1 (1)  |
| <i>Selenomonas sputigena</i> °            | 0.4 (3)  |
| <i>Shuttleworthia satelles</i> ▲          | 0.3 (2)  |
| <i>Slackia exigua</i> °                   | 1.7 (12) |
| <i>Solobacterium moorei</i> °             | 2.7 (19) |
| <i>Stomatobaculum longum</i> ▲            | 0.3 (2)  |
| <i>Varibaculum anthropi</i> ▲             | 0.1 (1)  |
| <i>Veillonella atypica</i> °              | 4.9 (34) |
| <i>Veillonella denticariosi</i> °         | 0.1 (1)  |
| <i>Veillonella dispar</i> °               | 3.0 (21) |
| <i>Veillonella parvula</i> °              | 6.8 (47) |
| <i>Veillonella</i> sp. ▲                  | 0.1 (1)  |

° identification by matrix-assisted laser desorption/ionization time-of-flight mass spectrometry (MALDI-TOF MS, Bruker)

▲ identification by 16S rRNA gene sequencing

**Table S5.** Comparison of detection of three anaerobic genera (*Prevotella*, *Veillonella* and *Fusobacterium*) by extended-culture and targeted molecular (quantitative PCR) approaches in 112 sputum samples (McNemar test)

|                      | <b>Culture approach</b>            | <b>Molecular approach</b>          |                                   | <b>p-value</b> |
|----------------------|------------------------------------|------------------------------------|-----------------------------------|----------------|
|                      | Percentage of positive samples (n) | Percentage of positive samples (n) | Median of quantification (CFU/mL) |                |
| <i>Prevotella</i>    | 92.0 (103)                         | 91.1 (102)                         | 1.65x10 <sup>6</sup>              | 1              |
| <i>Veillonella</i>   | 73.2 (82)                          | 89.2 (100)                         | 3.17x10 <sup>4</sup>              | <0.01          |
| <i>Fusobacterium</i> | 32.1 (36)                          | 67.9 (76)                          | 1.12x10 <sup>3</sup>              | <0.01          |

**Table S6.** Primers (and probe) used for detection and quantification of the genera *Prevotella*, *Veillonella* and *Fusobacterium* by quantitative PCR in sputum samples

| Genus                | Sequence*                                                                                                                                            | Targeted gene | Reference |
|----------------------|------------------------------------------------------------------------------------------------------------------------------------------------------|---------------|-----------|
| <i>Prevotella</i>    | Forward : 5'-GATGCGTCTGATTAGCTT-3'<br>Reverse: 5'-CCAATATTCCTCACTGCTG-3'                                                                             | 16S           | 44        |
| <i>Veillonella</i>   | Forward : 5'-CCGTGATGGGATGGAAACTGC-3'<br>Reverse : 5'-CCTTCGCCACTGGTGTTCCTC-3'                                                                       | 16S           | 43        |
| <i>Fusobacterium</i> | Forward : 5'-CGCAGAAGGTGAAAGTCCTGTAT-3'<br>Reverse : 5'-TGGTCCTCACTGATTCACACAGA-3'<br>Probe : 5'-FAM-<br>ACTTTGCTCCCAAGTAACATGGAACACGAG-<br>TAMRA-3' | 16S           | 45        |

\*FAM = 6-carboxyfluorescein; TAMRA = carboxytétraméthylrhodamine
